# Supplementary material
Source: Springer Nature journal article supplement (https://www.springermedizin.de/resource/supplementary/12913_2009_1116_MOESM2_ESM.pdf/9536400)
Supplement: MOESM2 [file 9536400]

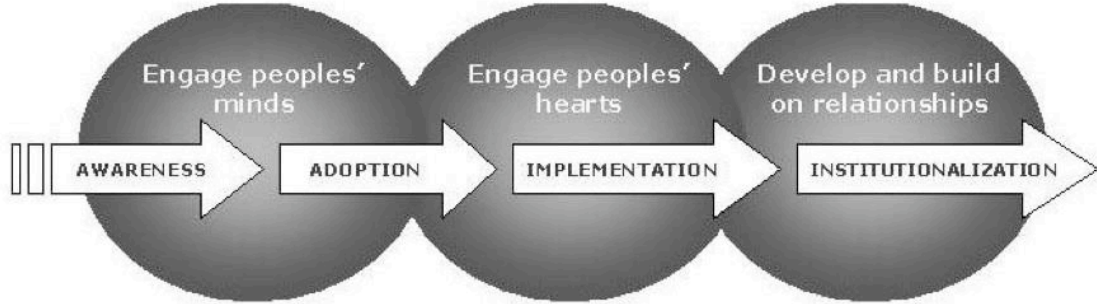

Modified from Goodman RM, Steckler A, Kegler MC. Mobilizing organizations for health enhancement. In: Glanz K, Lewis FM, Rimer BK, eds. Health behavior and health education: theory, research, and practice. San Francisco: Jossey-Bass, 1997:287-312.
